# Supplementary material for: A motif for B/O-site modulation in LaFeO3 towards boosted oxygen evolution
Source: Royal Society of Chemistry journal article supplement (doi:10.1039/d3nr05259a), 2024-01-01
Supplement: d3nr05259a1.pdf [file d3nr05259a1.pdf]

## Supporting Information

### Motif for B/O-sites modulation in LaFeO<sub>3</sub> towards boosted oxygen evolution

Wenli Kang<sup>a</sup>, Zhishan Li<sup>a\*</sup>, Jinsong Wang<sup>b</sup>, Shaopeng Wu<sup>a</sup>, Yiguang Gai<sup>a</sup>, Guanghao Wang<sup>a</sup>, Zhouhang Li<sup>a</sup>, Xing Zhu<sup>a</sup>, Tao Zhu<sup>a</sup>, Hua Wang<sup>a</sup>, Kongzhai Li<sup>a\*</sup>, Chundong Wang<sup>c</sup>

<sup>a</sup> Faculty of Metallurgical and Energy Engineering, Kunming University of Science and Technology, Kunming 650093, PR China

<sup>b</sup> Faculty of Materials Science and Engineering, Kunming University of Science and Technology, Kunming 650093, PR China

<sup>c</sup> School of Intergrated Circuits, Wuhan National Laboratory for Optoelectronics, Huazhong University of Science and Technology, Wuhan 430074, PR China

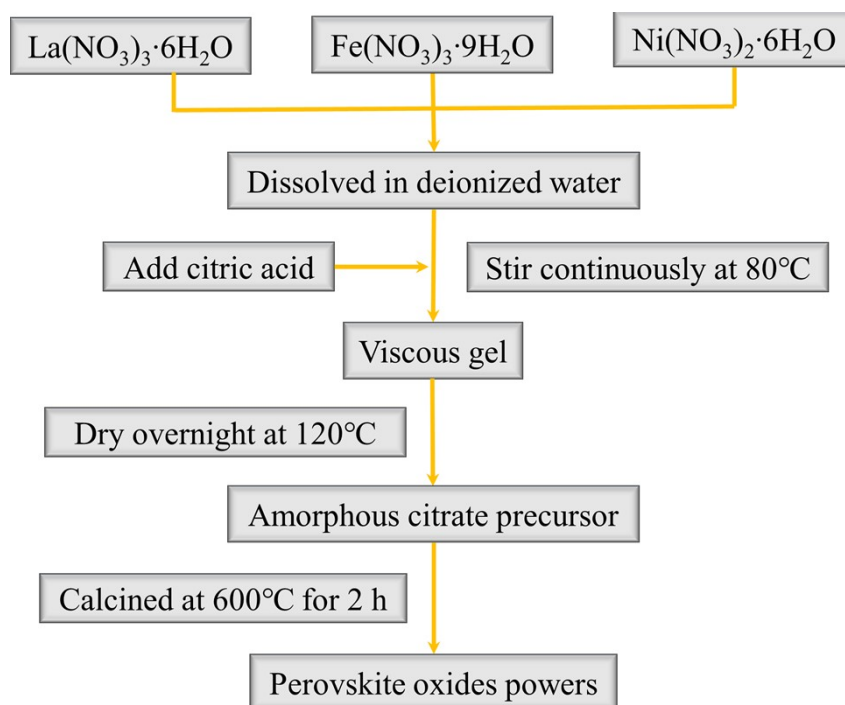

Fig. S1. Detail experiment procedures for fabrication of LaFe<sub>1-x</sub>Ni<sub>x</sub>O<sub>3-δ</sub> electrocatalysts with different Ni-concentration synthesized at 600°C.

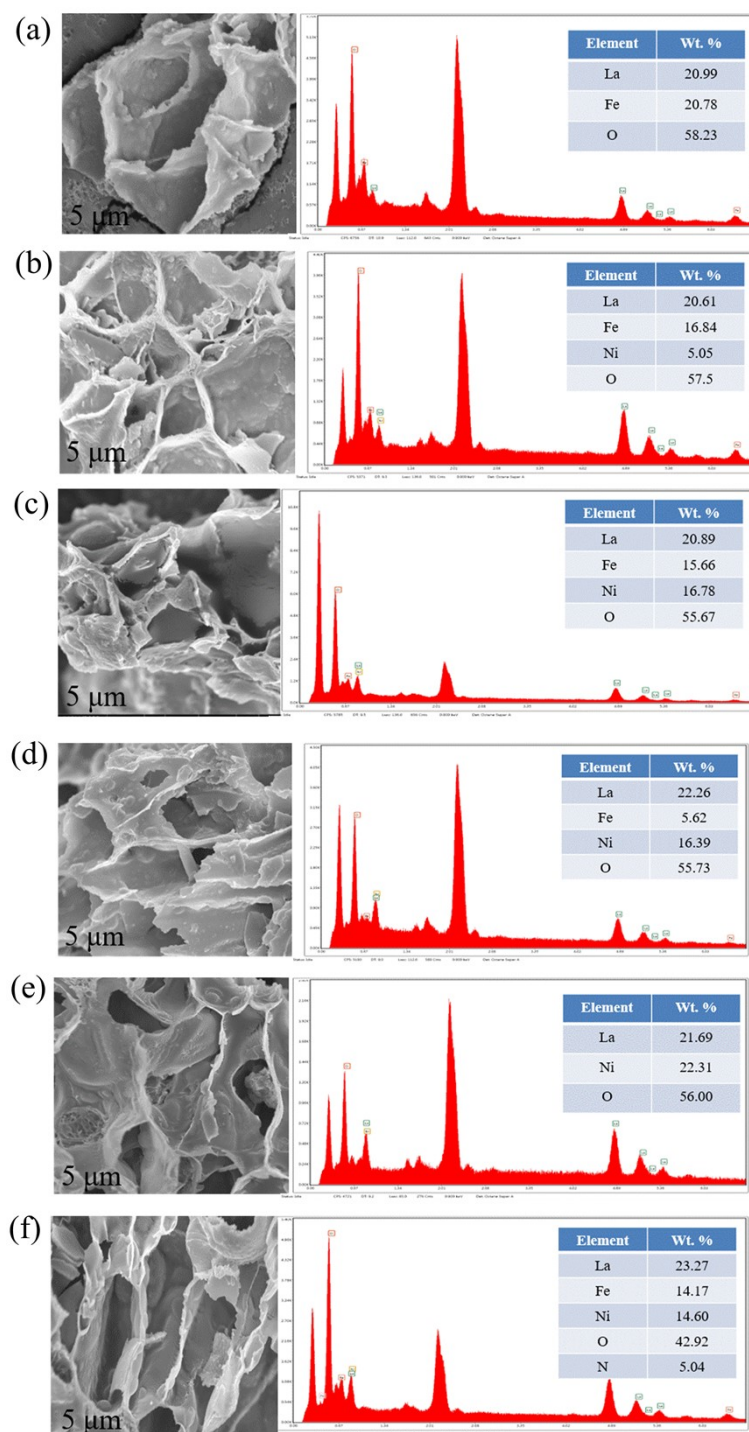

Fig. S2. SEM and EDS of (a)  $\text{LaFeO}_{3-\delta}$ , (b)  $\text{LaFe}_{0.75}\text{Ni}_{0.25}\text{O}_{3-\delta}$ , (c)  $\text{LaFe}_{0.5}\text{Ni}_{0.5}\text{O}_{3-\delta}$ , (d)  $\text{LaFe}_{0.25}\text{Ni}_{0.75}\text{O}_{3-\delta}$ , (e)  $\text{LaNiO}_{3-\delta}$ , and (f)  $\text{LaFe}_{0.5}\text{Ni}_{0.5}\text{O}_{3-\delta}/\text{N}$  catalysts (Inset is the corresponding element atoms percentage).

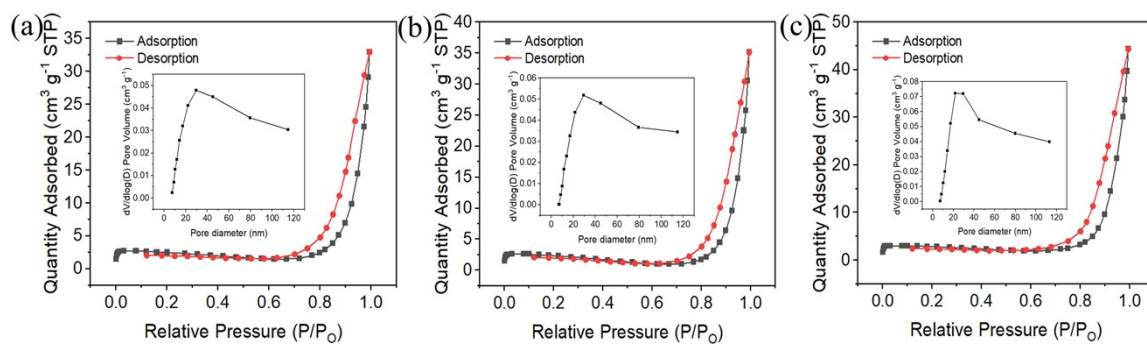

Fig. S3. Nitrogen adsorption-desorption hysteresis curve of (a)  $\text{LaFeO}_{3-\delta}$ , (b)  $\text{LaFe}_{0.5}\text{Ni}_{0.5}\text{O}_{3-\delta}$ , (c)  $\text{LaFe}_{0.5}\text{Ni}_{0.5}\text{O}_{3-\delta}/\text{N}$  catalysts (inset is the corresponding BJH pore size distribution curves).

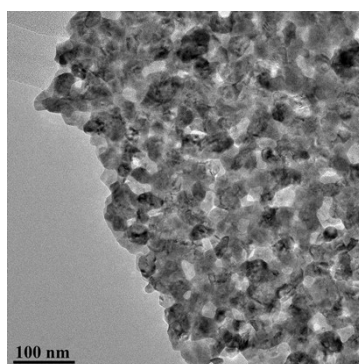

Fig. S4. TEM image of  $\text{LaFe}_{0.5}\text{Ni}_{0.5}\text{O}_{3-\delta}$ .

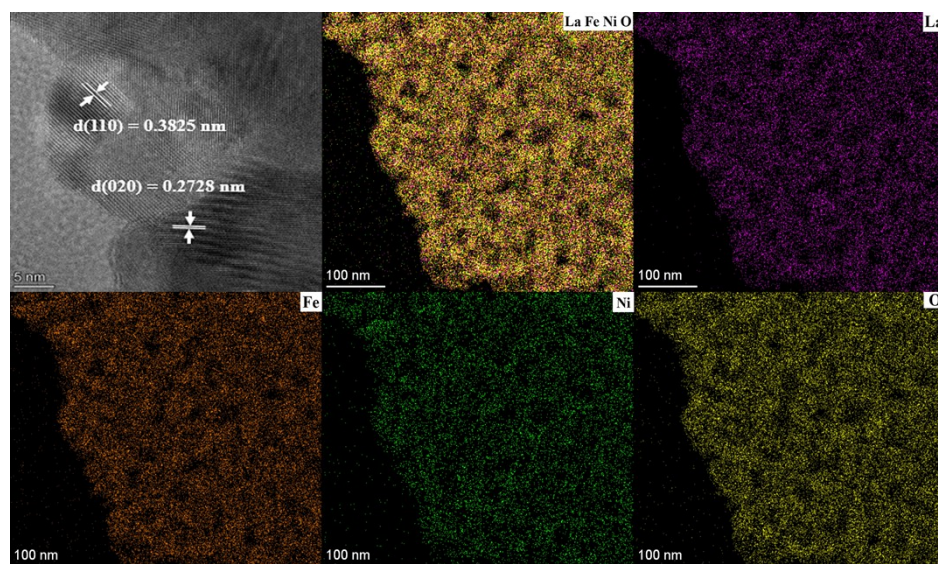

Fig. S5. HRTEM image of  $\text{LaFe}_{0.5}\text{Ni}_{0.5}\text{O}_{3-\delta}$  and the corresponding elemental mapping images of La, Fe, Ni, O.

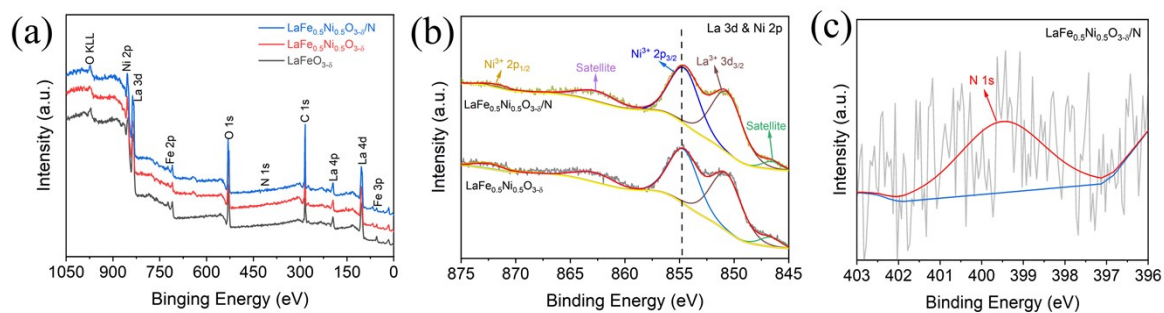

Fig. S6. (a) X-ray photoemission survey spectra of  $\text{LaFeO}_{3-\delta}$ ,  $\text{LaFe}_{0.5}\text{Ni}_{0.5}\text{O}_{3-\delta}$  and  $\text{LaFe}_{0.5}\text{Ni}_{0.5}\text{O}_{3-\delta}/\text{N}$ . (b-c) X-ray photoemission spectra of  $\text{LaFe}_{0.5}\text{Ni}_{0.5}\text{O}_{3-\delta}$  and  $\text{LaFe}_{0.5}\text{Ni}_{0.5}\text{O}_{3-\delta}/\text{N}$ . Each panel are corresponding binding energy range to (b) La3d & Ni2p and (c) N1s.

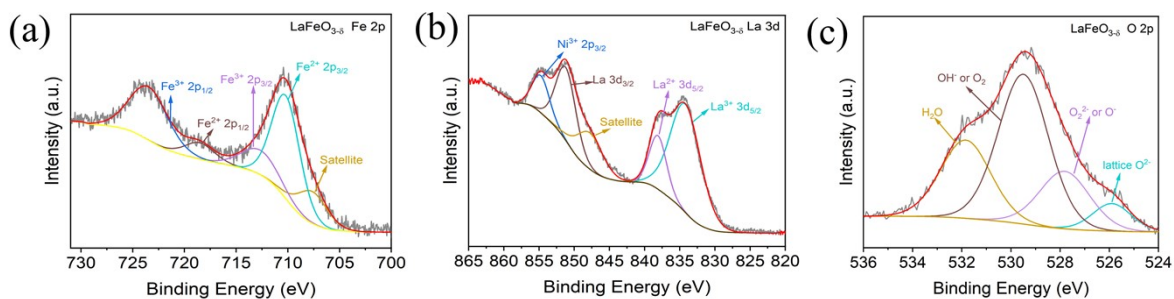

Fig. S7. (a-c) X-ray photoemission spectra of  $\text{LaFeO}_{3-\delta}$ . Each panel are corresponding binding energy range to (a) Fe 2p, (b) La 3d and (c) O 2p.

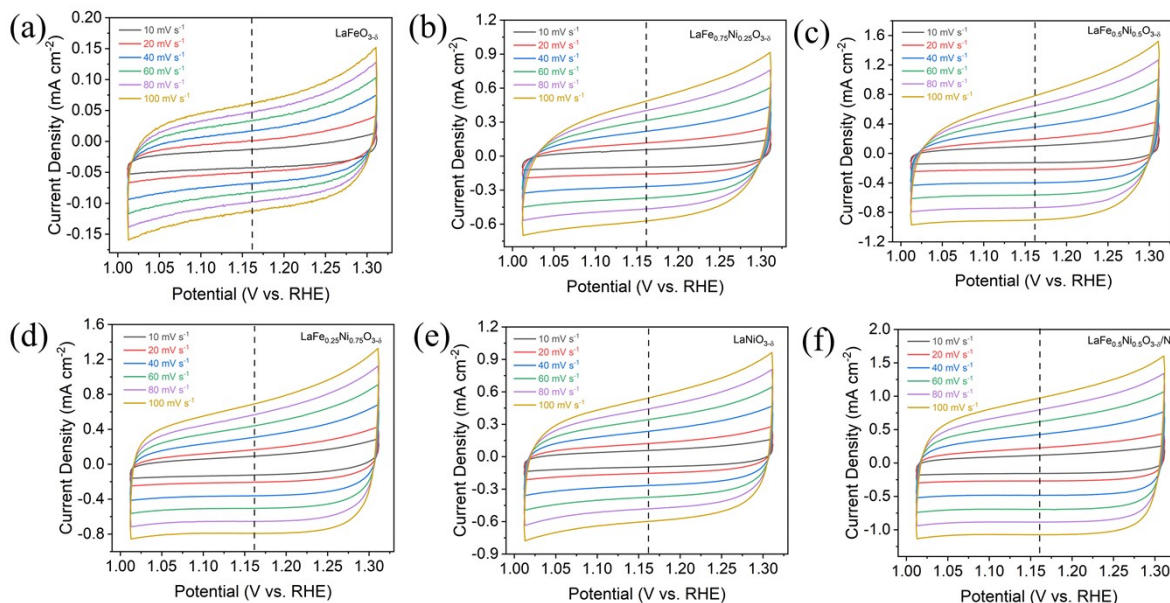

Fig. S8. CV measurements at different scan rates in a non-faradic current region with the scan interval of 100 mV s<sup>-1</sup> for (a) LaFeO<sub>3-δ</sub>, (b) LaFe<sub>0.75</sub>Ni<sub>0.25</sub>O<sub>3-δ</sub>, (c) LaFe<sub>0.5</sub>Ni<sub>0.5</sub>O<sub>3-δ</sub>, (d) LaFe<sub>0.25</sub>Ni<sub>0.75</sub>O<sub>3-δ</sub>, (e) LaNiO<sub>3-δ</sub>, and (f) LaFe<sub>0.5</sub>Ni<sub>0.5</sub>O<sub>3-δ</sub>/N catalysts.

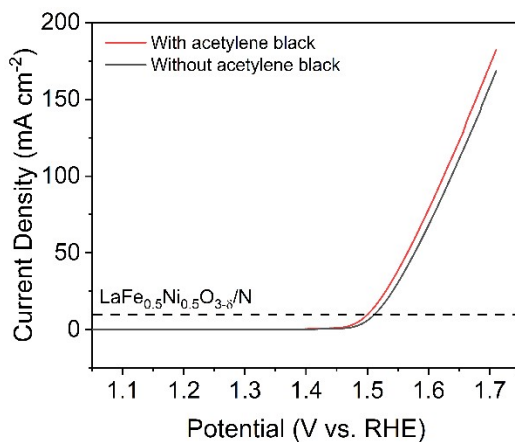

Fig. S9 Comparison of LSV polarization curves of sample LaFe<sub>0.5</sub>Ni<sub>0.5</sub>O<sub>3-δ</sub>/N with and without acetylene black.

Table S1. Atoms ratios of the  $\text{LaFe}_{1-x}\text{Ni}_x\text{O}_{3-\delta}$  ( $x = 0, 0.25, 0.5, 0.75, 1$ ) and  $\text{LaFe}_{0.5}\text{Ni}_{0.5}\text{O}_{3-\delta}/\text{N}$  derived from EDS analysis.

| Element                                                    | La /wt% | Fe /wt% | Ni /wt% | O /wt% | N /wt% |
|------------------------------------------------------------|---------|---------|---------|--------|--------|
| <b>LaFeO<sub>3-δ</sub></b>                                 | 20.99%  | 20.78%  | \       | 58.23% | \      |
| <b>LaFe<sub>0.75</sub>Ni<sub>0.25</sub>O<sub>3-δ</sub></b> | 20.61%  | 16.84%  | 5.05%   | 57.50% | \      |
| <b>LaFe<sub>0.5</sub>Ni<sub>0.5</sub>O<sub>3-δ</sub></b>   | 20.89%  | 15.66%  | 16.78%  | 55.67% | \      |
| <b>LaFe<sub>0.25</sub>Ni<sub>0.75</sub>O<sub>3-δ</sub></b> | 22.26%  | 5.62%   | 16.39%  | 55.73% | \      |
| <b>LaNiO<sub>3-δ</sub></b>                                 | 21.69%  | \       | 22.31%  | 56.00% | \      |
| <b>LaFe<sub>0.5</sub>Ni<sub>0.5</sub>O<sub>3-δ</sub>/N</b> | 23.27%  | 14.17%  | 14.60%  | 42.92% | 5.04%  |

Table S2. The details of the standard crystal planes of the reported materials.

| Materials                                            | Crystal planes<br>(h k l) | d (Å)  | 2θ (°) | Intensity (a.u.) |
|------------------------------------------------------|---------------------------|--------|--------|------------------|
| LaFe <sub>0.5</sub> Ni <sub>0.5</sub> O <sub>3</sub> | 020                       | 2.7356 | 32.710 | 31.7             |
|                                                      | 110                       | 3.8852 | 22.871 | 18.5             |

Table S3. Atoms ratios of the  $\text{LaFeO}_{3-\delta}$ ,  $\text{LaFe}_{0.5}\text{Ni}_{0.5}\text{O}_{3-\delta}$ , and  $\text{LaFe}_{0.5}\text{Ni}_{0.5}\text{O}_{3-\delta}/\text{N}$  derived from XPS analysis.

| Element<br>(Atomic %) | Electrocatalysts          |                                                       |                                                                |
|-----------------------|---------------------------|-------------------------------------------------------|----------------------------------------------------------------|
|                       | $\text{LaFeO}_{3-\delta}$ | $\text{LaFe}_{0.5}\text{Ni}_{0.5}\text{O}_{3-\delta}$ | $\text{LaFe}_{0.5}\text{Ni}_{0.5}\text{O}_{3-\delta}/\text{N}$ |
| <b>La 3d</b>          | 9.15                      | 9.54                                                  | 8.93                                                           |
| <b>Fe 2p</b>          | 8.06                      | 5.84                                                  | 6.11                                                           |
| <b>Ni 2p</b>          | \                         | 6.01                                                  | 6.65                                                           |
| <b>O 1s</b>           | 37.33                     | 35.04                                                 | 30.43                                                          |
| <b>N 2s</b>           | \                         | \                                                     | 2.35                                                           |
| <b>C 1s</b>           | 45.46                     | 43.57                                                 | 45.53                                                          |

Table S4. O 1s XPS deconvolution results of the  $\text{LaFeO}_{3-\delta}$ ,  $\text{LaFe}_{0.5}\text{Ni}_{0.5}\text{O}_{3-\delta}$ , and  $\text{LaFe}_{0.5}\text{Ni}_{0.5}\text{O}_{3-\delta}/\text{N}$ .

| Element                                                                          | $\text{H}_2\text{O}$ | $\text{OH}^-$ or $\text{O}_2$ | $\text{O}_2^{2-}$ or $\text{O}^-$ | Lattice $\text{O}^{2-}$ |
|----------------------------------------------------------------------------------|----------------------|-------------------------------|-----------------------------------|-------------------------|
| <b><math>\text{LaFeO}_{3-\delta}</math></b>                                      | 25.55%               | 48.93%                        | 18.69%                            | 6.83%                   |
| <b><math>\text{LaFe}_{0.5}\text{Ni}_{0.5}\text{O}_{3-\delta}</math></b>          | 18.33%               | 29.47%                        | 21.16%                            | 31.05%                  |
| <b><math>\text{LaFe}_{0.5}\text{Ni}_{0.5}\text{O}_{3-\delta}/\text{N}</math></b> | 15.43%               | 25.59%                        | 28.80%                            | 30.17%                  |

Table S5. OER activities of perovskite oxides.

| Catalysts                                                                               | Overpotential@10<br>mA cm <sup>-2</sup> (mV) | Tafel<br>(mV dec <sup>-1</sup> ) | References       |
|-----------------------------------------------------------------------------------------|----------------------------------------------|----------------------------------|------------------|
| <b>LaFe<sub>0.5</sub>Ni<sub>0.5</sub>O<sub>3-δ</sub></b>                                | <b>281.4</b>                                 | <b>75</b>                        | <b>This work</b> |
| <b>LaFe<sub>0.5</sub>Ni<sub>0.5</sub>O<sub>3-δ</sub>/N</b>                              | <b>270.6</b>                                 | <b>65</b>                        | <b>This work</b> |
| <b>LaFe<sub>0.2</sub>Ni<sub>0.8</sub>O<sub>3</sub></b>                                  | 420                                          | 89                               | 1                |
| <b>3D microporous<br/>LaFe<sub>0.8</sub>Co<sub>0.2</sub>O<sub>3</sub></b>               | 410                                          | 56                               | 2                |
| <b>La<sub>0.5</sub>Sr<sub>0.5</sub>Ni<sub>0.4</sub>Fe<sub>0.6</sub>O<sub>3-δ</sub></b>  | 342                                          | 85                               | 3                |
| <b>SrNb<sub>0.1</sub>Co<sub>0.7</sub>Fe<sub>0.2</sub>O<sub>3-δ</sub></b>                | 370                                          | 48                               | 4                |
| <b>NdBaMn<sub>2</sub>O<sub>5.5</sub></b>                                                | 370                                          | 75                               | 5                |
| <b>LaNi<sub>0.8</sub>Fe<sub>0.2</sub>O<sub>3-δ</sub>-NR</b>                             | 302                                          | 50                               | 6                |
| <b>PrBaCo<sub>2</sub>O<sub>5.75</sub></b>                                               | 360                                          | 70                               | 7                |
| <b>LaNi<sub>0.96</sub>Ir<sub>0.04</sub>O<sub>3</sub></b>                                | 280                                          | 62                               | 8                |
| <b>LaCoO<sub>3</sub>/N-rGO</b>                                                          | 560                                          | 65                               | 9                |
| <b>LaNiO<sub>3</sub>/NiO</b>                                                            | 346                                          | 73                               | 10               |
| <b>BaCo<sub>0.4</sub>Fe<sub>0.4</sub>Zr<sub>0.1</sub>Y<sub>0.1</sub>O<sub>3-δ</sub></b> | 324                                          | 69                               | 11               |
| <b>La<sub>2</sub>NiMnO<sub>6</sub></b>                                                  | 370                                          | 58                               | 12               |

## References

- [1] D. Zhang, Y. Song, Z. Du, L. Wang, Y. Li and J. B. Goodenough, *J. Mater. Chem. A*, 2015, **3**, 9421-9426.
- [2] J. Dai, Y. Zhu, Y. Zhong, J. Miao, B. Lin, W. Zhou and Z. Shao, *Adv. Mater. Interfaces*, 2018, **6**, 1801317.
- [3] C. C. Wang, Y. Cheng, E. Ianni, S. P. Jiang and B. Lin, *Electrochim. Acta*, 2017, **246**, 997-1003.



- [4] Y. Zhu, W. Zhou, Y. Zhong, Y. Bu, X. Chen, Q. Zhong, M. Liu and Z. Shao, *Adv. Energy Mater.*, 2016, **7**, 1602122.
- [5] C. Chen, Z. Wang, B. Zhang, L. Miao, J. Cai, L. Peng, Y. Huang, J. Jiang, Y. Huang, L. Zhang and J. Xie, *Energy Storage Mater.*, 2017, **8**, 161-168.
- [6] H. Wang, J. Wang, Y. Pi, Q. Shao, Y. Tan and X. Huang, *Angew. Chem. Int. Ed.*, 2019, **58**, 2316-2320.
- [7] X. Miao, L. Wu, Y. Lin, X. Yuan, J. Zhao, W. Yan, S. Zhou and L. Shi, *Chem. Commun.*, 2019, **55**, 1442-1445.
- [8] J. Li, L. Zheng, B. Huang, Y. Hu, L. An, Y. Yao, M. Lu, J. Jin, N. Zhang, P. Xi and C. H. Yan, *Small*, 2022, **18**, 2204723.
- [9] K. Liu, J. Li, Q. Wang, X. Wang, D. Qian, J. Jiang, J. Li and Z. Chen, *J. Alloys Compd.*, 2017, **725**, 260-269.
- [10] Y. Wei, Y. Zheng, Y. Hu, B. Huang, M. Sun, P. Da, P. Xi and C. H. Yan, *ACS Appl. Mater. Interfaces*, 2022, **14**, 25638-25647.
- [11] X. Li, J. Zhang, Q. Feng, C. Pu, L. Zhang, M. Hu, X. Zhou, X. Zhong, W. Yi, J. Tang, Z. Li, X. Zhao, H. Li and B. Xu, *J. Mater. Chem. A*, 2018, **6**, 17288-17296.
- [12] Y. Tong, J. Wu, P. Chen, H. Liu, W. Chu, C. Wu and Y. Xie, *J. Am. Chem. Soc.*, 2018, **140**, 11165-11169.
